# Supplementary material
Source: PubMed Central journal article supplement (PMC3288594)

## **LEGENDS FOR SUPPLEMENTARY FIGURES**

**Supplementary figure1:** The expression of MUC16 in different breast cancer cells, the panel shows that MUC16 is highly expressed in MDA MB 231 and HBL 100 cells [A]. Confocal analysis showed that decreased expression of MUC16 in MDA MB 231 and HBL 100 cells that were stably transfected with the MUC16 shRNA construct in comparison to empty-vector control cells [B]. The percentage of S-phase cells is significantly decreased in MUC16 knockdown cells ( $p=0.02$ ) compared with vector control cells [C].

**Supplementary figure.2:** Western blot analysis showed that phosphorylation of STAT3 and c-Jun are drastically reduced in MUC16 knockdown cells when compared to vector control cells, which is required for proliferation of breast cancer cells via cyclin D1 activation [A]. In addition, confocal analysis also indicates that distribution of cyclin A, cyclin E and cyclin D1 was considerably decreased in MUC16 knockdown cells than vector control [B]. Interestingly, p21 is highly distributed in cytoplasmic region of vector control cells than MUC16 knockdown cells [B].

**Supplementary figure.3:** The number of cells in G2/M phase increased in MUC16 knockdown cells HBL 100 [ $p\leq 0.04$ ] [A] and also decrease in cyclin B1 and phosphorylation of Aurora kinase A in MUC16-knockdown cells compared to the vector control cells by western blot [B]. Apoptosis analysis showing that percentage of apoptotic cells was significantly increased in the MUC16-knockdown cells compared to vector control cells [C].

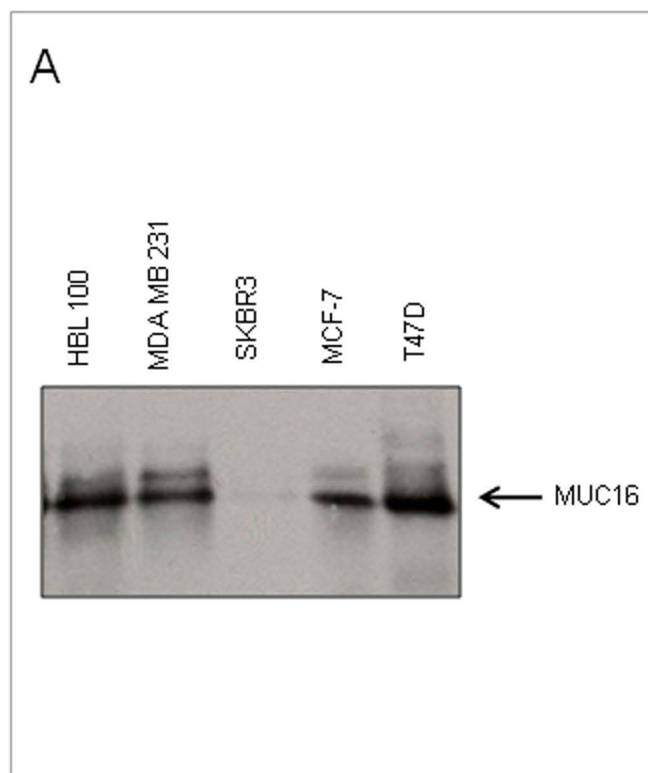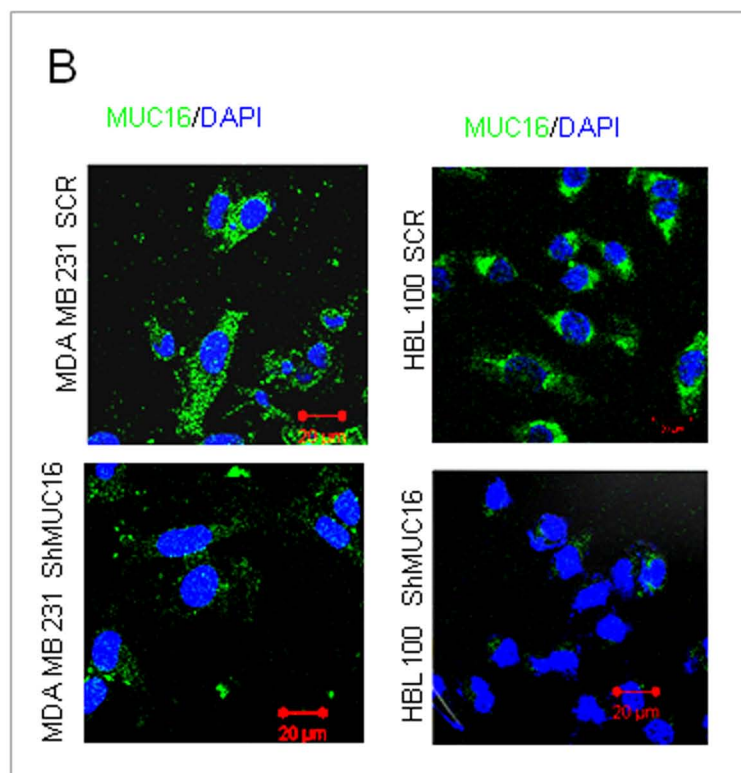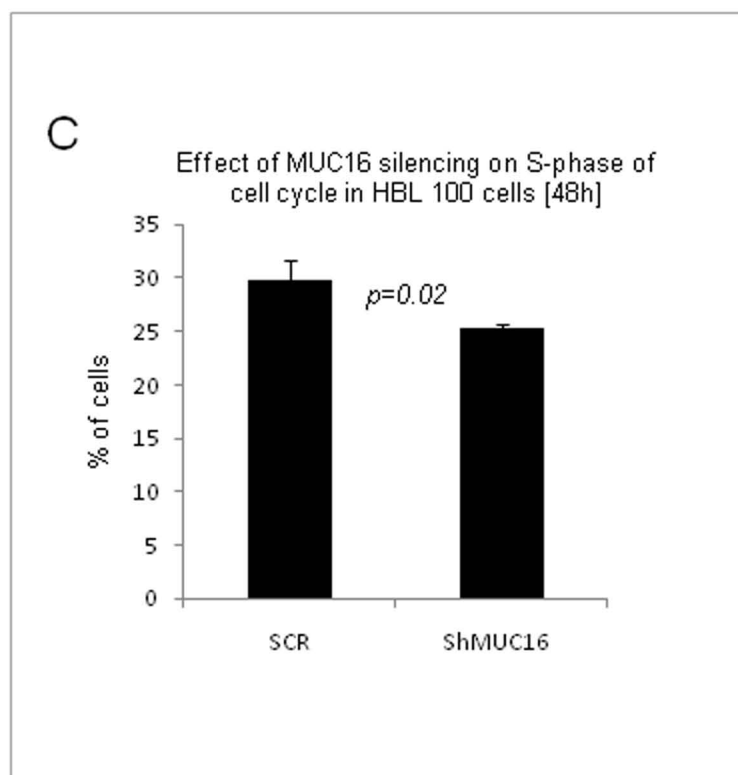

A

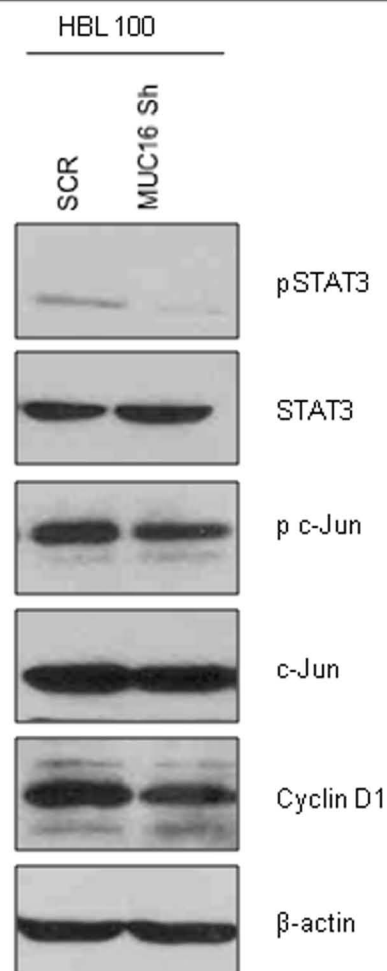

|           | Normalized with actin expression |              |
|-----------|----------------------------------|--------------|
|           | SCR                              | ShMUC16      |
| pSTAT3    | 1                                | 0.2 (-80%*)  |
| STAT3     | 1                                | 1.12 (+12%*) |
| p c-Jun   | 1                                | 0.7 (-30%*)  |
| c-Jun     | 1                                | 0.9 (-10%*)  |
| Cyclin D1 | 1                                | 0.7 (-30%*)  |

\* Percent change (+/-) relative to SCR

B

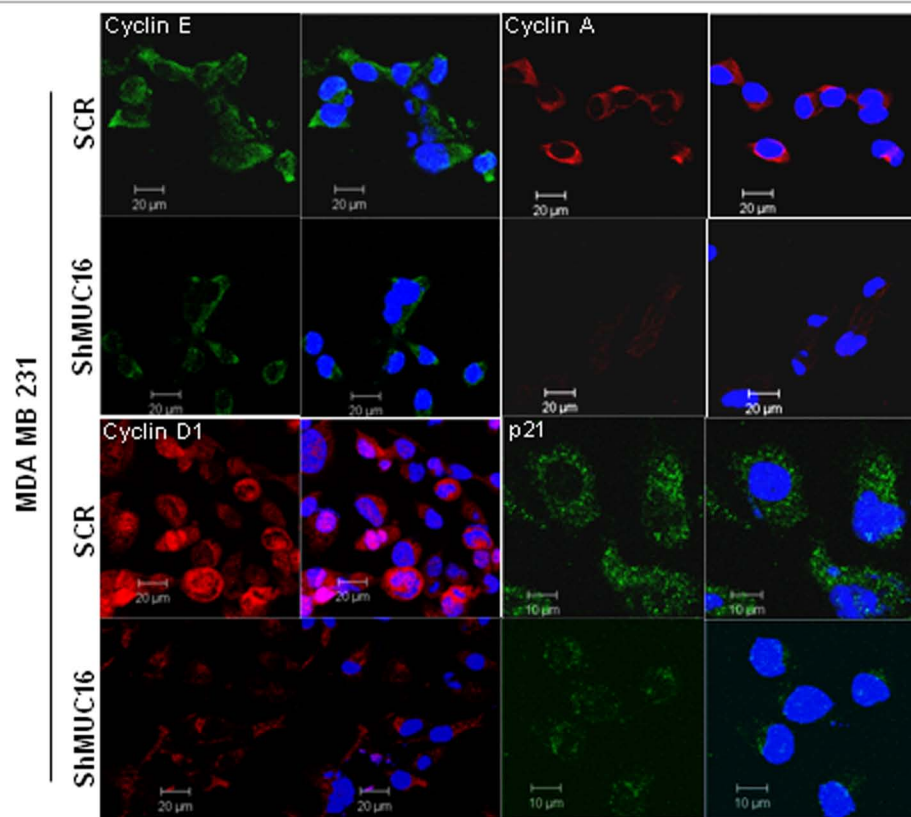

A

Effect of MUC16 silencing on G2/M phase of cell cycle in HBL 100 cells [48h]

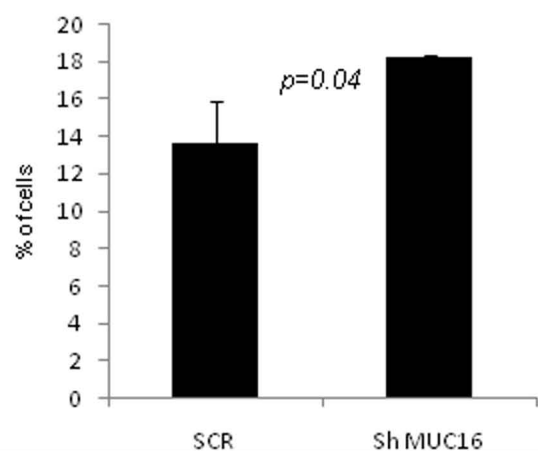

B

HBL 100

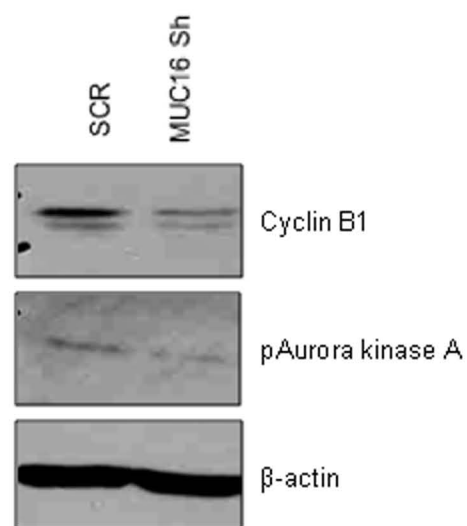

|                  | Normalized with actin expression |             |
|------------------|----------------------------------|-------------|
|                  | SCR                              | ShMUC16     |
| Cyclin B1        | 1                                | 0.7 (-30%*) |
| pAurora kinase A | 1                                | 0.4 (-60%*) |

\* Percent change (+/-) relative to SCR

C

Effect of MUC16 silencing on apoptotic activity of HBL 100 cells [48]

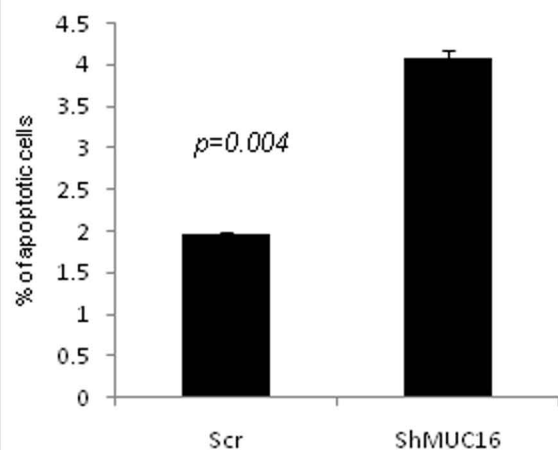

Supplement: NIHMS338764-supplement-supplement.pdf [file NIHMS338764-supplement-supplement.pdf]
